# Supplementary material for: Inhibitory role of acyl homoserine lactones in hemolytic activity and viability of Streptococcus pyogenes M6 S165
Source: PubMed Central journal article supplement (PMC5355980; doi:10.1038/srep44902), 2017-03-17
Supplement: srep44902-s1.pdf [file srep44902-s1.pdf]

1 **Inhibitory role of acyl homoserine lactones in hemolytic activity and**  
2 **viability of *Streptococcus pyogenes* M6 S165**

3

4

5 **Sunil D. Saroj, Linda Holmer, Júlia M. Berengueras, and Ann-Beth Jonsson\***

6

7 *Department of Molecular Biosciences, The Wenner-Gren Institute, Stockholm*

8 *University, 10691 Stockholm, Sweden.*

9

10

11 **\*Correspondence:**

12 Ann-Beth Jonsson, E-mail: ann-beth.jonsson@su.se, Phone: +46 8 164154

13

14

15

16 **Running title:** AHLs interfere with GAS virulence

17

18 **Keywords:** *Streptococcus pyogenes*, Acyl homoserine lactone, streptolysin,

19 microbiota, quorum sensing

20 **Supplementary Table 1. List of primers used for qPCR**

21

| Gene        | Sequence                             |
|-------------|--------------------------------------|
| <i>sagA</i> | F 5'-GCTACTAGTGTAGCTGAAACAACTCAA-3'  |
|             | R 5'-AGCAACAAGTAGTACAGCAGCAA-3'      |
| <i>luxS</i> | F 5'-AAGCTAATCCGCCAACGCAT-3'         |
|             | R 5'-TTTGGCGGCAAAGAGGCTAT-3'         |
| <i>luxR</i> | F 5'-GCAGGCGTTAAAGGCACAAA-3'         |
|             | R 5'-CTTTGATGAGTCAGGGGCGT-3'         |
| <i>gyrA</i> | F 5'-CGACTT GTCTGAACGCCAAAGT-3'      |
|             | R 5'-ATCACGTTCCAAACCAGTCAAAC-3'      |
| <i>slo</i>  | F 5'-TTGTTGAGGATAATGTAAGAATGTTTAG-3' |
|             | R 5'-TCCTGGCTTGCAACTGATTG-3'         |
| <i>covS</i> | F 5'-CATCTCCTGGCTTGCATGGT-3'         |
|             | R 5'-GGAAAACCCACGATACTGATCTTC-3'     |

22

23

24

25

26 **Supplementary Table 2. List of primers used for construction of *S. pyogenes***

27 **M6 S165 mutant strains**

28

| Gene          | Sequence                                  |
|---------------|-------------------------------------------|
| <i>slo</i>    | F 5'-ATGAAAGGATCCCCGCCACTCTTTGTGAG-3'     |
|               | R 5'-AAGTTACTGCAGCGATCACTTTTCGCCAC-3'     |
| <i>luxR</i>   | F 5'-ATGAAAGGATCCCCGTTTGGCAATTTGTCCGT-3'  |
|               | R 5'-AAGTTACTGCAGCTTTGATGAGTCAGGGGCGT-3'  |
| <i>FtsA</i>   | F 5'-ATGAAAGGATCCGGCCGCTAAGCCAATTGATG-3'  |
|               | R 5'-AAGTTACTGCAGCTAGGAGGCGTTCTCTTGC-3'   |
| <i>FtsB</i>   | F 5'-ATGAAAGGATCCTGCCAGCCGATAACAGCATT-3'  |
|               | R 5'-AAGTTACTGCAGGCAAAACGGCCATAAAGCCA-3'  |
| <i>FtsC</i>   | F 5'-ATGAAAGGATCCCCACGTCCCCAGTCTTTACC-3'  |
|               | R 5'-AAGTTACTGCAG TGCCTCAAATTGCTGGTGTG-3' |
| <i>FtsD</i>   | F 5'-ATGAAAGGATCCCAAACCCTTTGACGTTGCC-3'   |
|               | R 5'-AAGTTACTGCAGGCTGAAGACCTCACAATTGCC-3' |
| <i>luxR-P</i> | F 5'- ATTCCTTAAAATGACGAAGGGTATT-3'        |
|               | R 5'- CCTCATATGAGTTAGTTGTTAGAGGAGAA-3'    |
| <i>gyrA-P</i> | F 5'- CCTGGATCCGCAATATTTTGTGTTACC-3'      |
|               | R 5'- CCTTCGTCATTTTAAGGAATGTCCTTTTC-3'    |

29

30

31 **Supplementary Figure S1. Concentration of oxo-C12-HSL that inhibits**  
32 **hemolytic activity, and an assay to determine the type of hemolysin**  
33 **produced**

34 (A) Growth curve of *S. pyogenes* M6 S165 in the presence of different oxo-AHLs  
35 (20  $\mu$ M) (B) *S. pyogenes* M6 S165 growth supernatant was incubated with trypan  
36 blue and subjected to a hemolytic assay. The hemolytic activity was suppressed  
37 in the presence of trypan blue, indicating that SLS is the major hemolysin  
38 released into the growth media.

39

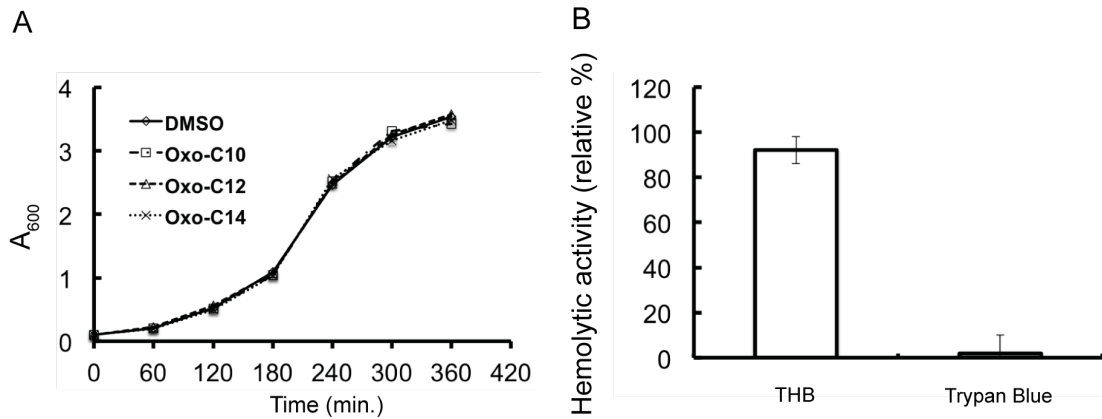

40

41

42

43 **Supplementary Figure S2. Bactericidal effect of oxo-C12-HSL on *S. pyogenes***

44 **M1**

45 Effect of glucose and iron on the *S. pyogenes* M1 growth inhibition by oxo-C12-

46 HSL was examined.

47

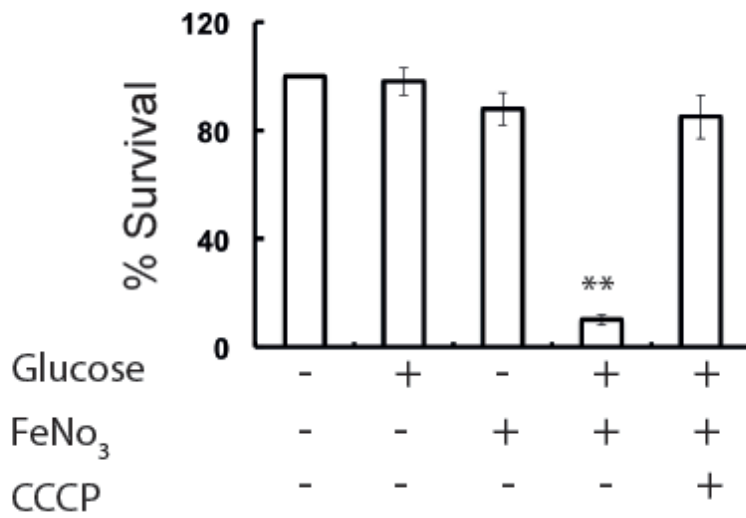

48

49

50

51 **Supplementary Figure S3. Growth Curve of *S. pyogenes* M6 S165 in CM**  
52 **prepared from *P. aeruginosa*.** The growth of *S. pyogenes* M6 S165 remains  
53 unaffected in the CM.

54

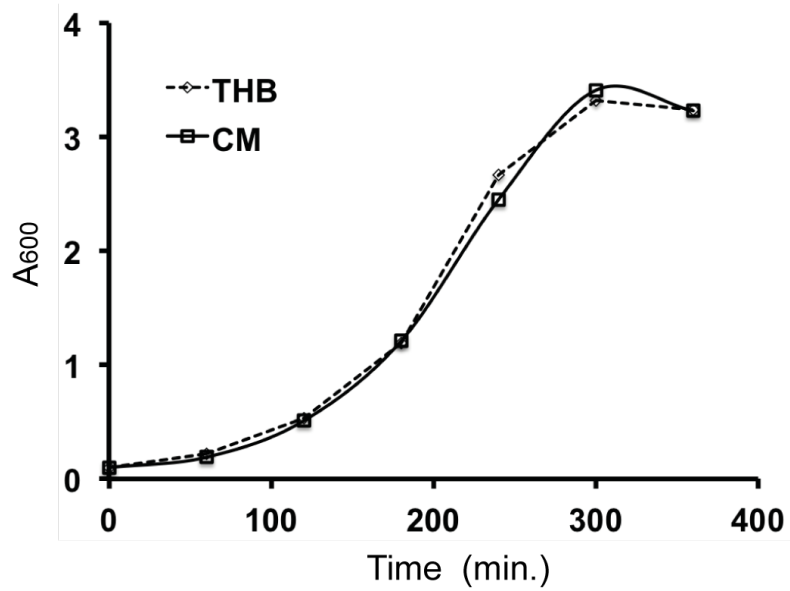

55

56

57 **Supplementary Figure S4. Growth curve and hemolytic activity of *S.***  
58 ***pyogenes* M6 S165 harboring luxR under gyrA promoter.**

59 (A) Growth curve (B) Hemolytic activity during different stages of growth

60

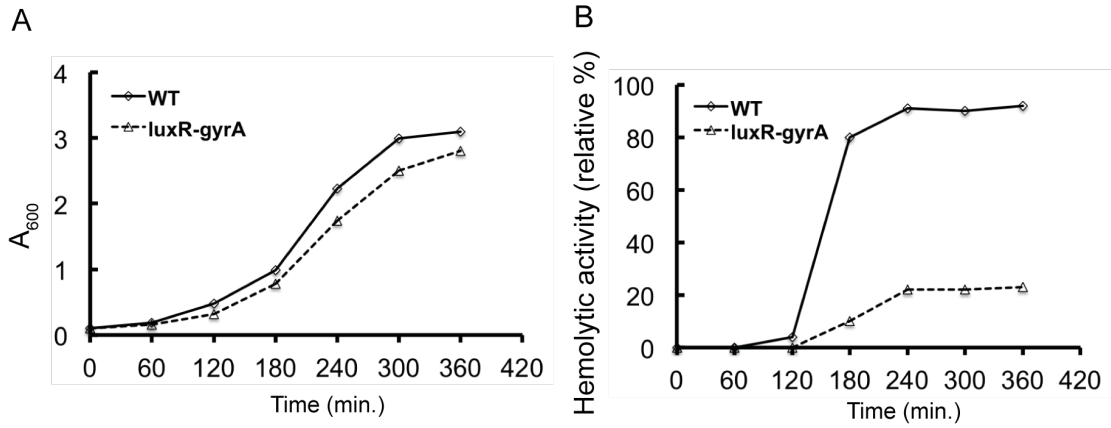

61

62
